# Supplementary material for: Rejuvenecer en la zona
Source: MDPI journal article supplement (doi:10.3390/cancers13174294), 2001-01-01
Supplement: s1 [file s1]

**Table S1.** Overview of first line curative and palliative treatments.

| <b>Curative intention</b>                   | <b>Total, n = 671</b> |        | <b>I, n = 354</b> |        | <b>II, n = 147</b> |        | <b>III, n = 170</b> |        | <b>IV, n = 0</b>   |        |
|---------------------------------------------|-----------------------|--------|-------------------|--------|--------------------|--------|---------------------|--------|--------------------|--------|
| Complete resection + AT                     | 163                   | (24.3) | 27                | (7.6)  | 58                 | (39.5) | 78                  | (45.9) | -                  | -      |
| Complete resection - AT                     | 409                   | (61.0) | 307               | (86.7) | 73                 | (49.7) | 29                  | (17.1) | -                  | -      |
| CT + RT <60 Gy                              | 13                    | (1.9)  | 0                 | (0.0)  | 0                  | (0.0)  | 13                  | (7.6)  | -                  | -      |
| CT + RT >60 Gy                              | 36                    | (5.4)  | 0                 | (0.0)  | 2                  | (1.4)  | 34                  | (20.0) | -                  | -      |
| RT <60 Gy                                   | 10                    | (1.5)  | 3                 | (0.8)  | 3                  | (2.0)  | 4                   | (2.4)  | -                  | -      |
| RT >60 Gy                                   | 8                     | (1.2)  | 0                 | (0.0)  | 4                  | (2.7)  | 4                   | (2.4)  | -                  | -      |
| SBRT                                        | 24                    | (3.6)  | 17                | (4.8)  | 5                  | (3.4)  | 2                   | (1.2)  | -                  | -      |
| Platinum doublet                            | 8                     | (1.2)  | 0                 | (0.0)  | 2                  | (1.4)  | 6                   | (3.5)  | -                  | -      |
| <b>Palliative intention</b>                 | <b>Total, n = 400</b> |        | <b>I, n = 0</b>   |        | <b>II, n = 0</b>   |        | <b>III, n = 59</b>  |        | <b>IV, n = 341</b> |        |
| Complete resection + AT                     | 9                     | (2.3)  | -                 | -      | -                  | -      | 0                   | (0.0)  | 9                  | (2.6)  |
| Complete resection -AT                      | 2                     | (0.5)  | -                 | -      | -                  | -      | 0                   | (0.0)  | 2                  | (0.6)  |
| CT                                          | 137                   | (34.3) | -                 | -      | -                  | -      | 21                  | (35.6) | 116                | (34.0) |
| RT                                          | 43                    | (10.8) | -                 | -      | -                  | -      | 5                   | (8.5)  | 38                 | (11.1) |
| CT + RT                                     | 91                    | (22.8) | -                 | -      | -                  | -      | 18                  | (30.5) | 73                 | (21.4) |
| TKI                                         | 41                    | (10.3) | -                 | -      | -                  | -      | 3                   | (5.1)  | 38                 | (11.1) |
| ICI monotherapy                             | 40                    | (10.0) | -                 | -      | -                  | -      | 8                   | (13.6) | 32                 | (9.4)  |
| ICI combination therapy                     | 37                    | (9.3)  | -                 | -      | -                  | -      | 4                   | (6.8)  | 33                 | (9.7)  |
| No treatment (% of total for each category) | 46                    | (4.1)  | 5                 | (1.4)  | 1                  | (0.7)  | 1                   | (0.4)  | 39                 | (11.4) |

Abbreviations: AT, adjuvant therapy; CT, chemotherapy; RT, radiotherapy; Gy, Gray; SBRT, stereotactic body radiation therapy; TKI, tyrosine kinase inhibitor; ICI, immune checkpoint inhibitor.

**Table S2.** Associations between baseline patient characteristics and KRAS status, KRAS G12C, G12V and G12D.

| Characteristic                          | KRAS wild type (n = 697) |        | KRAS mutated (n = 420) |        | p-value | G12C (n = 192) |        | G12V (n = 81) |        | G12D (n = 70) |        | p-value |
|-----------------------------------------|--------------------------|--------|------------------------|--------|---------|----------------|--------|---------------|--------|---------------|--------|---------|
| Sex                                     |                          |        |                        |        |         |                |        |               |        |               |        |         |
| Female                                  | 353                      | (50.6) | 239                    | (56.9) | 0.042   | 114            | (59.4) | 39            | (48.1) | 44            | (62.9) | 0.136   |
| Male                                    | 344                      | (49.4) | 181                    | (43.1) |         | 78             | (40.6) | 42            | (51.9) | 26            | (37.1) |         |
| Age (years)                             |                          |        |                        |        |         |                |        |               |        |               |        |         |
| <50                                     | 29                       | (4.2)  | 17                     | (4.0)  | 0.967   | 9              | (4.7)  | 3             | (3.7)  | 2             | (2.9)  | 0.702   |
| 50–60                                   | 104                      | (14.9) | 65                     | (15.5) |         | 33             | (17.2) | 9             | (11.1) | 11            | (15.7) |         |
| >60                                     | 564                      | (80.9) | 338                    | (80.5) |         | 150            | (78.1) | 69            | (85.2) | 57            | (81.4) |         |
| Smoking history                         |                          |        |                        |        |         |                |        |               |        |               |        |         |
| Never                                   | 113                      | (16.2) | 13                     | (3.1)  | <0.001  | 3              | (1.6)  | 2             | (2.5)  | 6             | (8.6)  | 0.016   |
| Former/current                          | 584                      | (83.8) | 407                    | (96.9) |         | 189            | (98.4) | 79            | (97.5) | 64            | (91.4) |         |
| ECOG PS                                 |                          |        |                        |        |         |                |        |               |        |               |        |         |
| 0–1                                     | 650                      | (93.3) | 387                    | (92.1) | 0.771   | 178            | (92.7) | 78            | (96.3) | 63            | (90.0) | 0.669   |
| 2                                       | 35                       | (5.0)  | 24                     | (5.7)  |         | 10             | (5.2)  | 2             | (2.5)  | 5             | (7.1)  |         |
| 3–4                                     | 12                       | (1.7)  | 9                      | (2.1)  |         | 4              | (2.1)  | 1             | (1.2)  | 2             | (2.9)  |         |
| Disease stage                           |                          |        |                        |        |         |                |        |               |        |               |        |         |
| I                                       | 218                      | (31.3) | 141                    | (33.6) | 0.763   | 69             | (35.9) | 25            | (30.9) | 23            | (32.9) | 0.790   |
| II                                      | 94                       | (13.5) | 54                     | (12.9) |         | 26             | (13.5) | 12            | (14.8) | 7             | (10.0) |         |
| III                                     | 141                      | (20.2) | 89                     | (21.2) |         | 41             | (21.4) | 21            | (25.9) | 14            | (20.0) |         |
| IV                                      | 244                      | (35.0) | 136                    | (32.4) |         | 56             | (29.2) | 23            | (28.4) | 26            | (37.1) |         |
| Surgery                                 |                          |        |                        |        |         |                |        |               |        |               |        |         |
| No                                      | 339                      | (48.6) | 195                    | (46.4) | 0.474   | 83             | (43.2) | 33            | (40.7) | 32            | (45.7) | 0.827   |
| Yes                                     | 358                      | (51.4) | 225                    | (53.6) |         | 109            | (56.8) | 48            | (59.3) | 38            | (54.3) |         |
| Number of metastatic sites at diagnosis |                          |        |                        |        |         |                |        |               |        |               |        |         |
| No metastases                           | 287                      | (41.3) | 194                    | (46.4) | 0.535   | 93             | (48.7) | 37            | (45.7) | 31            | (44.9) | 0.821   |
| Local                                   | 199                      | (28.6) | 104                    | (24.9) |         | 48             | (25.1) | 25            | (30.9) | 17            | (24.6) |         |
| 1 distant site                          | 116                      | (16.7) | 68                     | (16.3) |         | 27             | (14.1) | 12            | (14.8) | 9             | (13.0) |         |
| 2 distant sites                         | 61                       | (8.8)  | 34                     | (8.1)  |         | 14             | (7.3)  | 5             | (6.2)  | 6             | (8.7)  |         |
| 3 or more distant sites                 | 32                       | (4.6)  | 18                     | (4.3)  |         | 9              | (4.7)  | 2             | (2.5)  | 6             | (8.7)  |         |
| No information                          | 2                        | -      | 2                      | -      |         | 1              | -      | 0             | -      | 1             | -      |         |
| Metastatic sites involved*              |                          |        |                        |        |         |                |        |               |        |               |        |         |
| Pleura                                  |                          |        |                        |        |         |                |        |               |        |               |        |         |
| No                                      | 603                      | (86.9) | 391                    | (93.5) | <0.001  | 181            | (94.3) | 78            | (96.3) | 62            | (91.2) | 0.413   |
| Yes                                     | 91                       | (13.1) | 27                     | (6.5)  |         | 11             | (5.7)  | 3             | (3.7)  | 6             | (8.8)  |         |
| No information                          | 3                        | -      | 2                      | -      |         | 0              | -      | 0             | -      | 2             | -      |         |

|                |     |        |     |        |       |     |        |    |        |    |        |       |
|----------------|-----|--------|-----|--------|-------|-----|--------|----|--------|----|--------|-------|
| Adrenal gland  |     |        |     |        |       |     |        |    |        |    |        |       |
| No             | 653 | (94.0) | 387 | (92.4) | 0.301 | 179 | (93.2) | 77 | (95.1) | 63 | (91.3) | 0.657 |
| Yes            | 42  | (6.0)  | 32  | (7.6)  |       | 13  | (6.8)  | 4  | (4.9)  | 6  | (8.7)  |       |
| No information | 2   | -      | 1   | -      |       | 0   | -      | 0  | -      | 1  | -      |       |
| Liver          |     |        |     |        |       |     |        |    |        |    |        |       |
| No             | 651 | (93.7) | 392 | (93.6) | 0.940 | 178 | (92.7) | 77 | (95.1) | 65 | (94.2) | 0.747 |
| Yes            | 44  | (6.3)  | 27  | (6.4)  |       | 14  | (7.3)  | 4  | (4.9)  | 4  | (5.8)  |       |
| No information | 2   | -      | 1   | -      |       | 0   | -      | 0  | -      | 1  | -      |       |
| Skeleton       |     |        |     |        |       |     |        |    |        |    |        |       |
| No             | 621 | (89.4) | 365 | (87.1) | 0.256 | 166 | (86.5) | 76 | (93.8) | 57 | (82.6) | 0.098 |
| Yes            | 74  | (10.6) | 54  | (12.9) |       | 26  | (13.5) | 5  | (6.2)  | 12 | (17.4) |       |
| No information | 2   | -      | 1   | -      |       | 0   | -      | 0  | -      | 1  | -      |       |
| Brain          |     |        |     |        |       |     |        |    |        |    |        |       |
| No             | 642 | (92.4) | 386 | (92.1) | 0.880 | 180 | (93.8) | 75 | (92.6) | 60 | (87.0) | 0.196 |
| Yes            | 53  | (7.6)  | 33  | (7.9)  |       | 12  | (6.3)  | 6  | (7.4)  | 9  | (13.0) |       |
|                | 2   | -      | 1   | -      |       | 0   | -      | 0  | -      | 1  | -      |       |

Data are presented as *n* (%). Percentages are rounded and may not add up exactly to 100%. \* cases with co-occurring metastases in other sites included. Abbreviations: PFS, progression free survival; OS, overall survival; HR, hazard ratio; ECOG PS, Eastern Cooperative Oncology Group performance status.

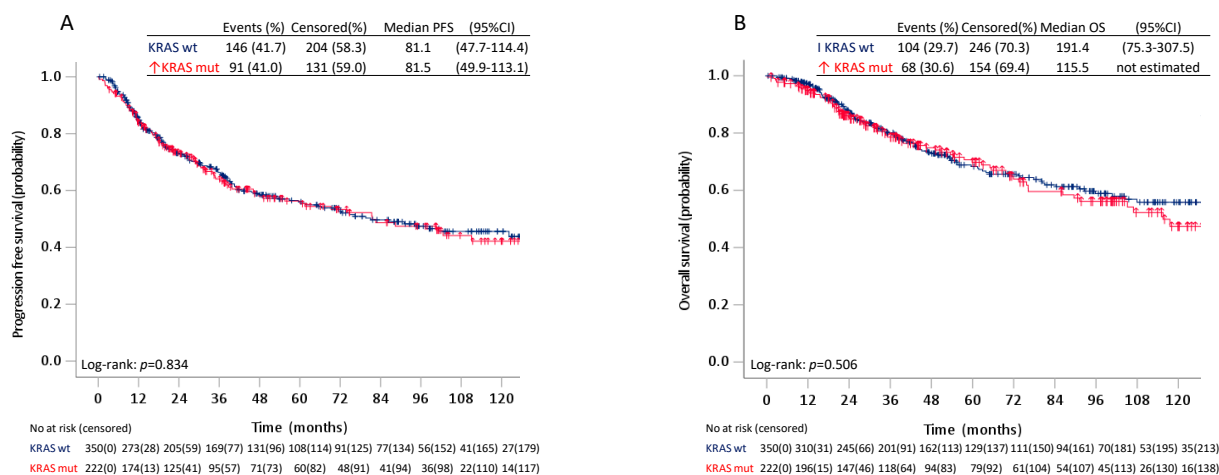

**Figure S1.** Progression free survival (A) and overall survival (B) in resected patients stage I-III with KRAS wild type and KRAS mutated tumours. .

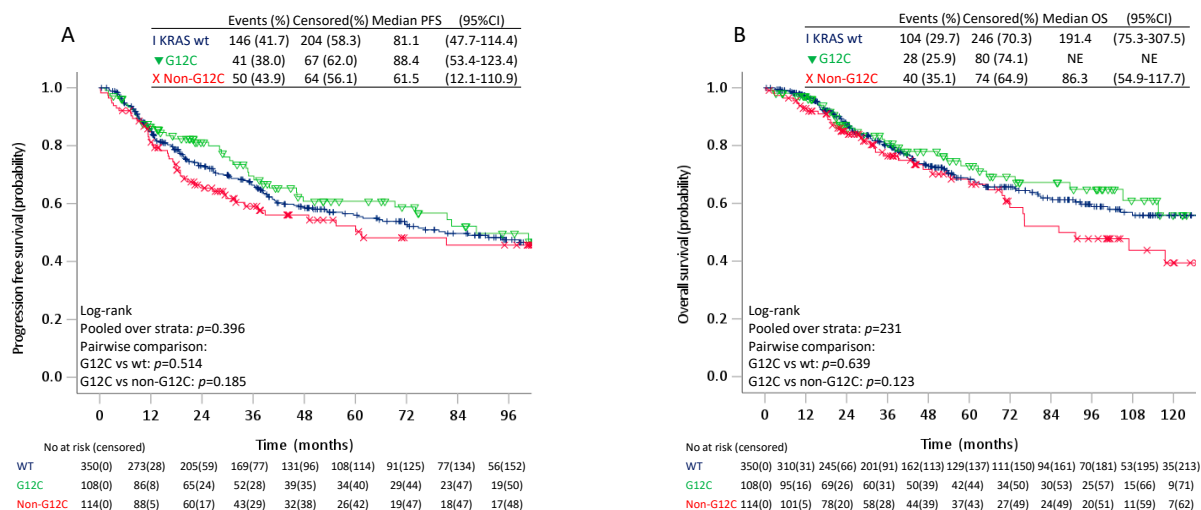

**Figure S2.** Progression free survival (A) and overall survival (B) in resected patients stage I-III with KRAS wild type, KRAS G12C and KRAS non-G12C mutated tumours.

**Table S3.** Multivariable analyses of progression free survival and overall survival in resected patients stage I-III with KRAS wild type, KRAS mutated (any mutation), KRAS G12C mutated and KRAS non-G12C mutated tumours.

| Variable           | PFS    |             |          | OS     |             |          | PFS    |             |          | OS     |             |          |
|--------------------|--------|-------------|----------|--------|-------------|----------|--------|-------------|----------|--------|-------------|----------|
|                    | HR     | 95%CI       | <i>p</i> |
| Sex                |        |             |          |        |             |          |        |             |          |        |             |          |
| Women              | 1(ref) |             |          | 1(ref) |             |          | 1(ref) |             |          | 1(ref) |             |          |
| Men                | 0.97   | (0.75–1.26) | 0.808    | 1.09   | (0.80–1.48) | 0.577    | 0.99   | (0.76–1.28) | 0.916    | 1.11   | (0.82–1.51) | 0.497    |
| Age (years)        | 1.00   | (0.99–1.02) | 0.861    | 1.02   | (1.01–1.05) | 0.014    | 1.00   | (0.98–1.02) | 0.933    | 1.02   | (1.00–1.04) | 0.018    |
| Smoking history    |        |             |          |        |             |          |        |             |          |        |             |          |
| Never              | 1(ref) |             |          | 1(ref) |             |          | 1(ref) |             |          | 1(ref) |             |          |
| Former/current     | 1.32   | (0.85–2.03) | 0.217    | 1.84   | (1.05–3.23) | 0.033    | 1.32   | (0.86–2.04) | 0.209    | 1.85   | (1.05–3.24) | 0.032    |
| Disease stage      |        |             |          |        |             |          |        |             |          |        |             |          |
| I                  | 1(ref) |             |          | 1(ref) |             |          | 1(ref) |             |          | 1(ref) |             |          |
| II                 | 1.96   | (1.40–2.74) | <0.001   | 1.67   | (1.13–2.48) | 0.010    | 1.98   | (1.41–2.78) | <0.001   | 1.70   | (1.15–2.52) | 0.008    |
| III                | 3.24   | (2.22–4.73) | <0.001   | 2.60   | (1.69–4.02) | <0.001   | 3.19   | (2.18–4.66) | <0.001   | 2.55   | (1.65–3.94) | <0.001   |
| Adjuvant treatment |        |             |          |        |             |          |        |             |          |        |             |          |
| No                 | 1(ref) |             |          | 1(ref) |             |          | 1(ref) |             |          | 1(ref) |             |          |
| Yes                | 1.03   | (0.73–1.46) | 0.872    | 1.28   | (0.86–1.91) | 0.230    | 1.04   | (0.73–1.47) | 0.845    | 1.28   | (0.86–1.92) | 0.224    |
| KRAS status        |        |             |          |        |             |          |        |             |          |        |             |          |
| Wild type          | 1(ref) |             |          | 1(ref) |             |          | -      | -           | -        | -      | -           | -        |
| Mutated            | 0.97   | (0.74–1.27) | 0.844    | 1.03   | (0.75–1.41) | 0.866    | -      | -           | -        | -      | -           | -        |
| KRAS G12C status   |        |             |          |        |             |          |        |             |          |        |             |          |
| Wild type          | -      | -           | -        | -      | -           | -        | 1(ref) |             |          | 1(ref) |             |          |
| G12C               | -      | -           | -        | -      | -           | -        | 0.85   | (0.60–1.21) | 0.359    | 0.86   | (0.56–1.32) | 0.495    |
| KRAS non-G12C      | -      | -           | -        | -      | -           | -        | 1.11   | (0.80–1.54) | 0.540    | 1.19   | (0.82–1.73) | 0.370    |

Abbreviations: PFS, progression free survival; OS, overall survival; HR, hazard ratio; ECOG PS, Eastern Cooperative Oncology Group performance status.

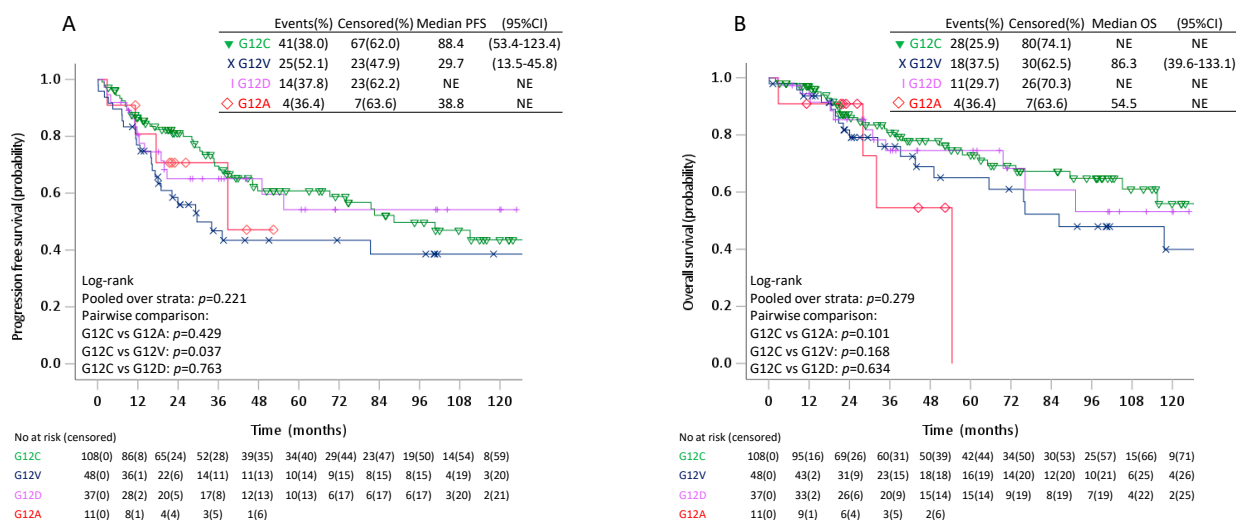

**Figure S3.** Progression free survival (A) and overall survival (B) in resected patients stage I-III with KRAS G12C, G12V, G12D and G12A mutated tumours.

**Table S4.** Multivariable analyses of PFS and OS in resected patients stage I-III with KRAS G12C and G12V mutated tumours.

| Variable           | HR     | 95%(C)      | p     | HR     | 95%(C)       | p     |
|--------------------|--------|-------------|-------|--------|--------------|-------|
| Sex                |        |             |       |        |              |       |
| Female             | 1(ref) |             |       | 1(ref) |              |       |
| Male               | 0.85   | (0.54–1.34) | 0.475 | 0.89   | (0.52–1.53)  | 0.677 |
| Age (years)        | 1.00   | (0.97–1.03) | 0.811 | 1.00   | (0.96–1.03)  | 0.768 |
| Smoking history    |        |             |       |        |              |       |
| Never              | 1(ref) |             |       | 1(ref) |              |       |
| Former/current     | 1.72   | (0.40–7.45) | 0.467 | 2.28   | (0.30–17.27) | 0.426 |
| Adjuvant treatment |        |             |       |        |              |       |
| No                 | 1(ref) |             |       | 1(ref) |              |       |
| Yes                | 1.04   | (0.56–1.94) | 0.898 | 0.83   | (0.39–1.74)  | 0.613 |
| Disease stage      |        |             |       |        |              |       |
| I                  | 1(ref) |             |       | 1(ref) |              |       |
| II                 | 1.38   | (0.74–2.60) | 0.316 | 1.18   | (0.56–2.48)  | 0.657 |
| III                | 2.75   | (1.44–5.26) | 0.002 | 2.06   | (2.06–0.92)  | 0.078 |
| KRAS mutation      |        |             |       |        |              |       |
| G12C               | 1(ref) |             |       | 1(ref) |              |       |
| G12V               | 1.43   | (0.85–2.39) | 0.180 | 1.32   | (0.71–2.45)  | 0.378 |
| G12D               | 1.16   | (0.61–2.19) | 0.655 | 1.23   | (0.60–2.55)  | 0.576 |

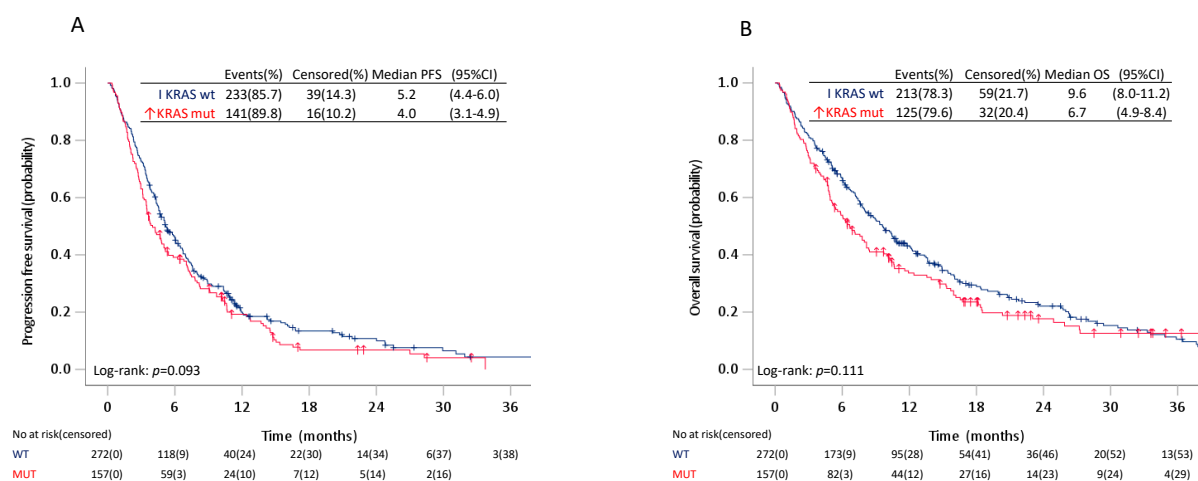

**Figure S4.** Progression free survival (A) and overall survival (B) in patients with advanced KRAS wild type and KRAS mutated tumours. .

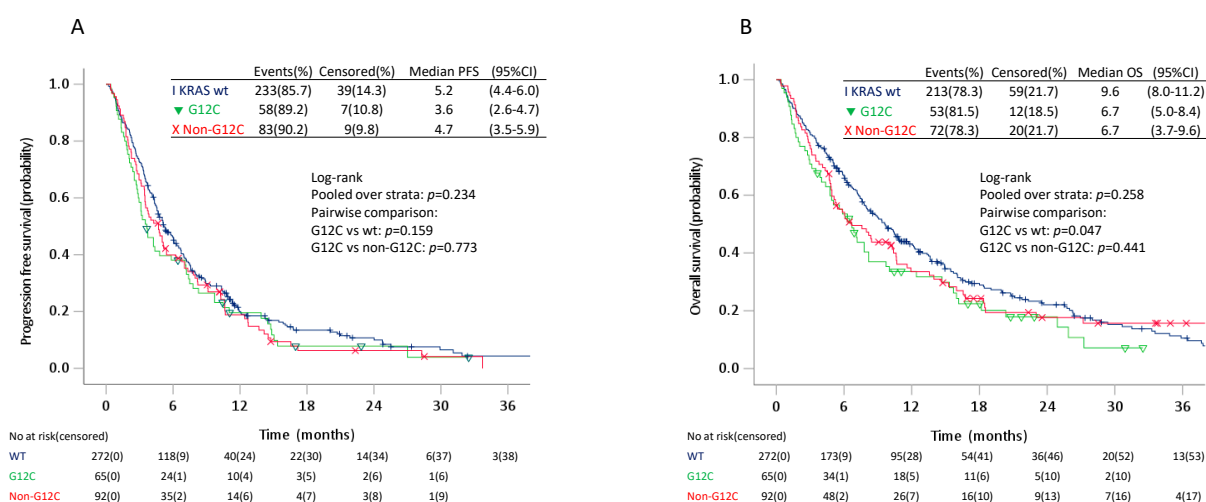

**Figure S5.** Progression free survival (A) and overall survival (B) in patients advanced KRAS wild type, KRAS G12C mutated and KRAS non-G12C mutated tumours.

**Table S5.** Multivariable analyses of progression free survival and overall survival in patients with advanced disease and KRAS wild type, KRAS mutated (any mutation), KRAS G12C mutated and KRAS non-G12C mutated tumours.

| Variable                              | PFS    |             |          | OS     |              |          | PFS    |             |          | OS     |              |          |
|---------------------------------------|--------|-------------|----------|--------|--------------|----------|--------|-------------|----------|--------|--------------|----------|
|                                       | HR     | 95% CI      | <i>p</i> | HR     | 95% CI       | <i>p</i> | HR     | 95% CI      | <i>p</i> | HR     | 95% CI       | <i>p</i> |
| Age (years)                           | 1.00   | (0.99–1.01) | 0.569    | 1.02   | (1.00–1.03)  | 0.005    | 1.00   | (0.99–1.01) | 0.547    | 1.02   | (1.00–1.03)  | 0.005    |
| Sex                                   |        |             |          |        |              |          |        |             |          |        |              |          |
| Women                                 | 1(ref) |             |          | 1(ref) |              |          | 1(ref) |             |          | 1(ref) |              |          |
| Men                                   | 1.06   | (0.86–1.32) | 0.590    | 0.96   | (0.77–1.20)  | 0.725    | 1.07   | (0.86–1.33) | 0.537    | 0.97   | (0.77–1.21)  | 0.767    |
| ECOG PS                               |        |             |          |        |              |          |        |             |          |        |              |          |
| 0–1                                   | 1(ref) |             |          | 1(ref) |              |          | 1(ref) |             |          | 1(ref) |              |          |
| 2                                     | 1.58   | (1.13–2.19) | 0.007    | 2.12   | (1.51–2.98)  | <0.001   | 1.59   | (1.15–2.22) | 0.006    | 2.15   | (1.53–3.04)  | <0.001   |
| 3–4                                   | 4.33   | (2.48–7.57) | <0.001   | 6.19   | (3.45–11.10) | <0.001   | 4.38   | (2.50–7.65) | <0.001   | 6.18   | (3.44–11.11) | <0.001   |
| Smoking history                       |        |             |          |        |              |          |        |             |          |        |              |          |
| Never smoker                          | 1(ref) |             |          | 1(ref) |              |          | 1(ref) |             |          | 1(ref) |              |          |
| Former/current                        | 1.44   | (1.00–2.08) | 0.052    | 1.38   | (0.94–2.04)  | 0.103    | 1.43   | (0.99–2.08) | 0.055    | 1.38   | (0.93–2.03)  | 0.107    |
| Palliative CT first line              |        |             |          |        |              |          |        |             |          |        |              |          |
| No                                    | 1(ref) |             |          | 1(ref) |              |          | 1(ref) |             |          | 1(ref) |              |          |
| Yes                                   | 1.12   | (0.84–1.50) | 0.432    | 0.81   | (0.69–1.10)  | 0.184    | 1.14   | (0.85–1.52) | 0.382    | 0.82   | (0.60–1.12)  | 0.216    |
| History of TKI (any line)             |        |             |          |        |              |          |        |             |          |        |              |          |
| No                                    |        |             |          |        |              |          |        |             |          |        |              |          |
| Yes                                   | 0.44   | (0.30–0.64) | <0.001   | 0.35   | (0.23–0.52)  | <0.001   | 0.44   | (0.30–0.65) | <0.001   | 0.35   | (0.23–0.52)  | <0.001   |
| History of ICI (any line/combination) |        |             |          |        |              |          |        |             |          |        |              |          |
| No                                    | 1(ref) |             |          | 1(ref) |              |          | 1(ref) |             |          | 1(ref) |              |          |
| Yes                                   | 0.60   | (0.45–0.81) | 0.001    | 0.45   | (0.33–0.61)  | <0.001   | 0.61   | (0.45–0.81) | 0.001    | 0.45   | (0.33–0.62)  | <0.001   |
| Disease stage                         |        |             |          |        |              |          |        |             |          |        |              |          |
| III                                   | 1(ref) |             |          | 1(ref) |              |          | 1(ref) |             |          | 1(ref) |              |          |
| IV                                    | 1.59   | (1.17–2.17) | 0.003    | 1.71   | (1.23–2.39)  | 0.002    | 1.59   | (1.17–2.16) | 0.003    | 1.71   | (1.22–2.39)  | 0.002    |
| KRAS status                           |        |             |          |        |              |          |        |             |          |        |              |          |
| Wild type                             |        |             |          |        |              |          | -      | -           | -        | -      | -            | -        |
| Mutated                               | 0.97   | (0.77–1.21) | 0.784    | 1.05   | (0.82–1.32)  | 0.715    | -      | -           | -        | -      | -            | -        |
| KRAS G12C status                      |        |             |          |        |              |          |        |             |          |        |              |          |
| Wild type                             | -      | -           | -        | -      | -            | -        | 1(ref) |             |          | 1(ref) |              |          |
| G12C                                  | -      | -           | -        | -      | -            | -        | 1.06   | (0.78–1.43) | 0.726    | 1.16   | (0.85–1.59)  | 0.346    |



KRAS non-G12C

-

-

-

-

-

-

0.92 (0.70–1.20) 0.522

0.97 (0.73–1.29) 0.842

Abbreviations: PFS progression free survival; OS overall survival; HR hazard ratio; ECOG PS Eastern Cooperative Oncology Group performance status; RT radiotherapy; CT chemotherapy; TKI tyrosine kinase inhibitor; ICI immune checkpoint inhibitor. .

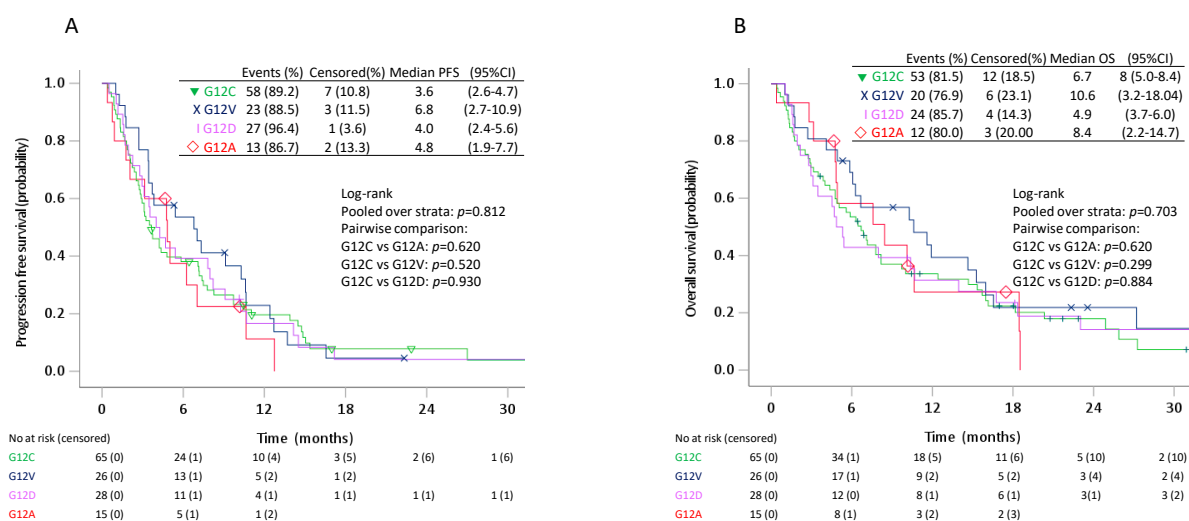

**Figure S6.** Progression free survival (A) and overall survival (B) in patients with advanced KRAS G12C, G12V, G12D and G12A mutated tumours.

**Table S6.** Multivariable analyses of progression free survival and overall survival in patients with advanced disease. and KRAS G12C, G12V and G12A mutated tumours.

| Variable                               | PFS     |             |          | OS      |              |          |
|----------------------------------------|---------|-------------|----------|---------|--------------|----------|
|                                        | HR      | 95% CI      | <i>p</i> | HR      | 95% CI       | <i>p</i> |
| Age (years)                            | 1.00    | (0.98–1.02) | 0.801    | 1.01    | (0.99–1.04)  | 0.165    |
| Sex                                    |         |             |          |         |              |          |
| Women                                  | 1 (ref) |             |          | 1 (ref) |              |          |
| Men                                    | 1.34    | (0.89–2.00) | 0.162    | 1.00    | (0.65–1.54)  | 0.987    |
| ECOG PS                                |         |             |          |         |              |          |
| 0–1                                    | 1 (ref) |             |          | 1 (ref) |              |          |
| 2                                      | 1.50    | (0.84–2.70) | 0.171    | 1.91    | (1.04–3.49)  | 0.036    |
| 3–4                                    | 3.22    | (1.25–8.30) | 0.015    | 5.51    | (2.06–14.70) | 0.001    |
| Smoking history                        |         |             |          |         |              |          |
| Never smoker                           | 1 (ref) |             |          | 1 (ref) |              |          |
| Former/current smoker                  | 0.56    | (0.16–1.90) | 0.349    | 0.51    | (0.15–1.79)  | 0.295    |
| Palliative CT and/or RT first line     |         |             |          |         |              |          |
| No                                     | 1 (ref) |             |          | 1 (ref) |              |          |
| Yes                                    | 0.99    | (0.56–1.74) | 0.964    | 0.87    | (0.49–1.56)  | 0.650    |
| History of TKI (any line) Yes/No       |         |             |          |         |              |          |
| No                                     | 1 (ref) |             |          | 1 (ref) |              |          |
| Yes                                    | 1.14    | (0.46–2.83) | 0.777    | 1.34    | (0.52–3.42)  | 0.547    |
| History of ICI (any line/ combination) |         |             |          |         |              |          |
| No                                     | 1 (ref) |             |          | 1 (ref) |              |          |
| Yes                                    | 0.48    | (0.28–0.84) | 0.010    | 0.46    | (0.27–0.80)  | 0.006    |
| Disease stage                          |         |             |          |         |              |          |
| III                                    | 1 (ref) |             |          | 1 (ref) |              |          |
| IV                                     | 1.03    | (0.61–1.76) | 0.900    | 1.19    | (0.67–2.13)  | 0.558    |

| KRAS mutation |         |             |       |  |         |              |       |
|---------------|---------|-------------|-------|--|---------|--------------|-------|
| G12A          | 1 (ref) |             |       |  | 1 (ref) |              |       |
| G12C          | 0.74    | (0.44–1.25) | 0.261 |  | 0.70    | (0.40–1.23)  | 0.215 |
| G12V          | 0.87    | (0.54–1.40) | 0.563 |  | 0.90    | (0.55–0.148) | 0.681 |
| G12D          | 1.14    | (0.60–2.17) | 0.695 |  | 0.90    | (0.45–1.78)  | 0.755 |

Abbreviations: PFS, progression free survival; OS, overall survival; HR, hazard ratio; ECOG PS, Eastern Cooperative Oncology Group performance status; RT, radiotherapy; CT, chemotherapy; TKI, tyrosine kinase inhibitor; ICI, immune checkpoint inhibitor.
